# Supplementary material for: Non-Destructive Identification of Dyes on Fabric Using Near-Infrared Raman Spectroscopy
Source: MDPI journal article supplement (doi:10.3390/molecules28237864), 2023-11-30
Supplement: s1 [file s1]

# Non-Destructive Identification of Dyes on Fabric Using Near-Infrared Raman Spectroscopy

Mackenzi Peterson<sup>1</sup> and Dmitry Kurouski<sup>2\*</sup>

1. Department of Entomology, Texas A&M University, College Station, Texas 77843, United States
2. Department of Biochemistry and Biophysics, Texas A&M University, College Station, Texas 77843, United States

## Supporting Information

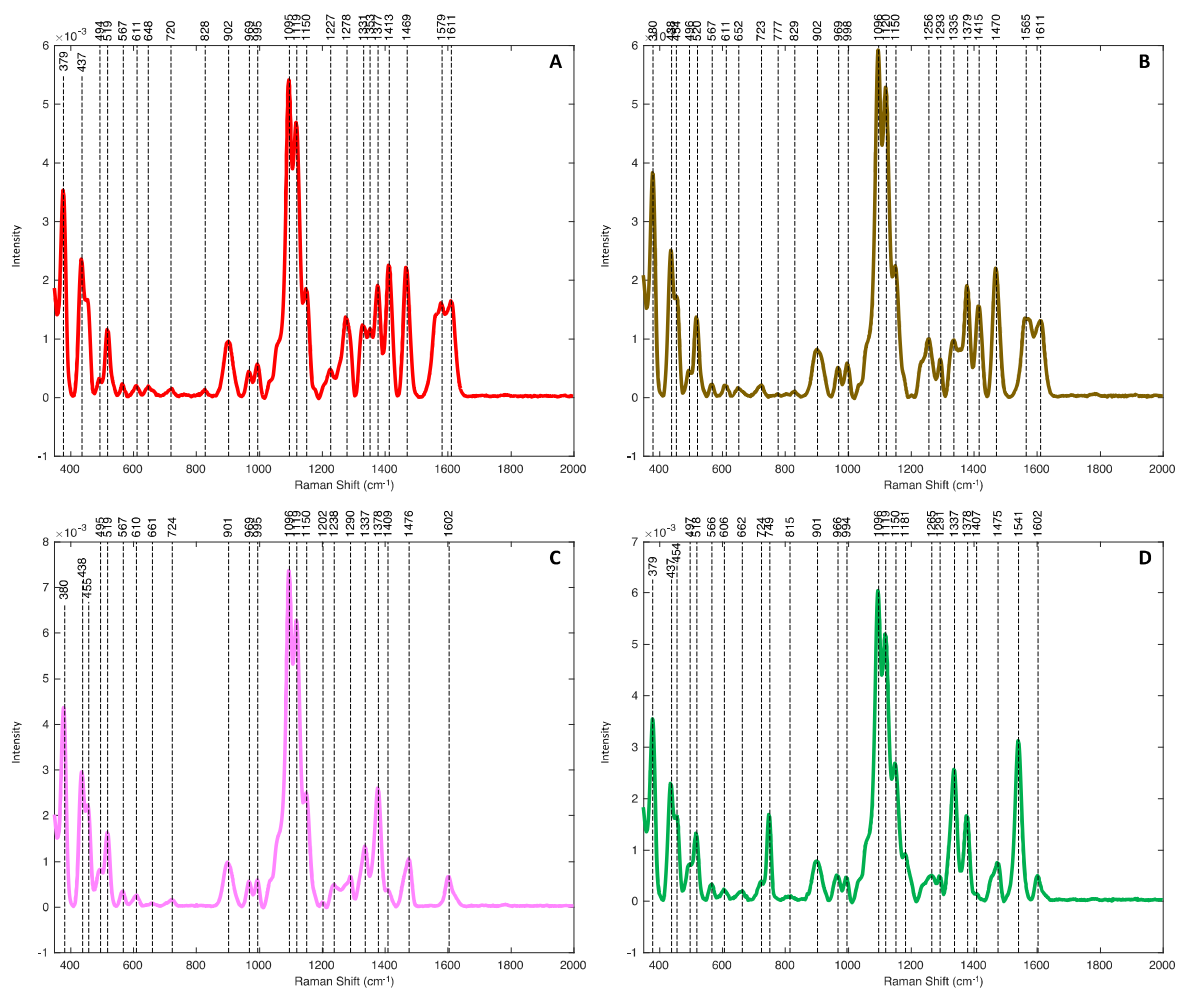

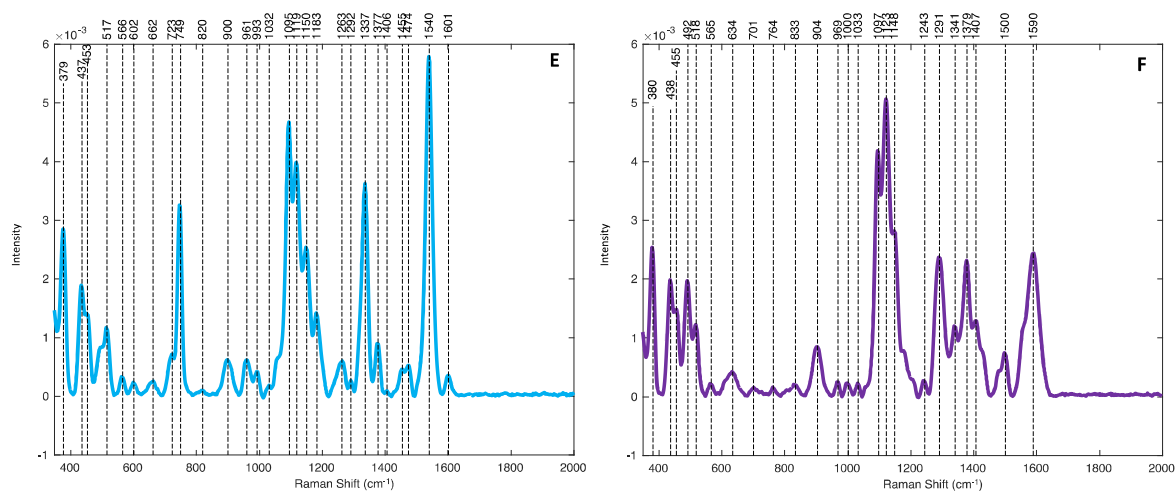

**Figure S1:** Average NIR Spectra of the following dyed cotton samples: A) red B) orange C) yellow D) green E) blue and F) purple

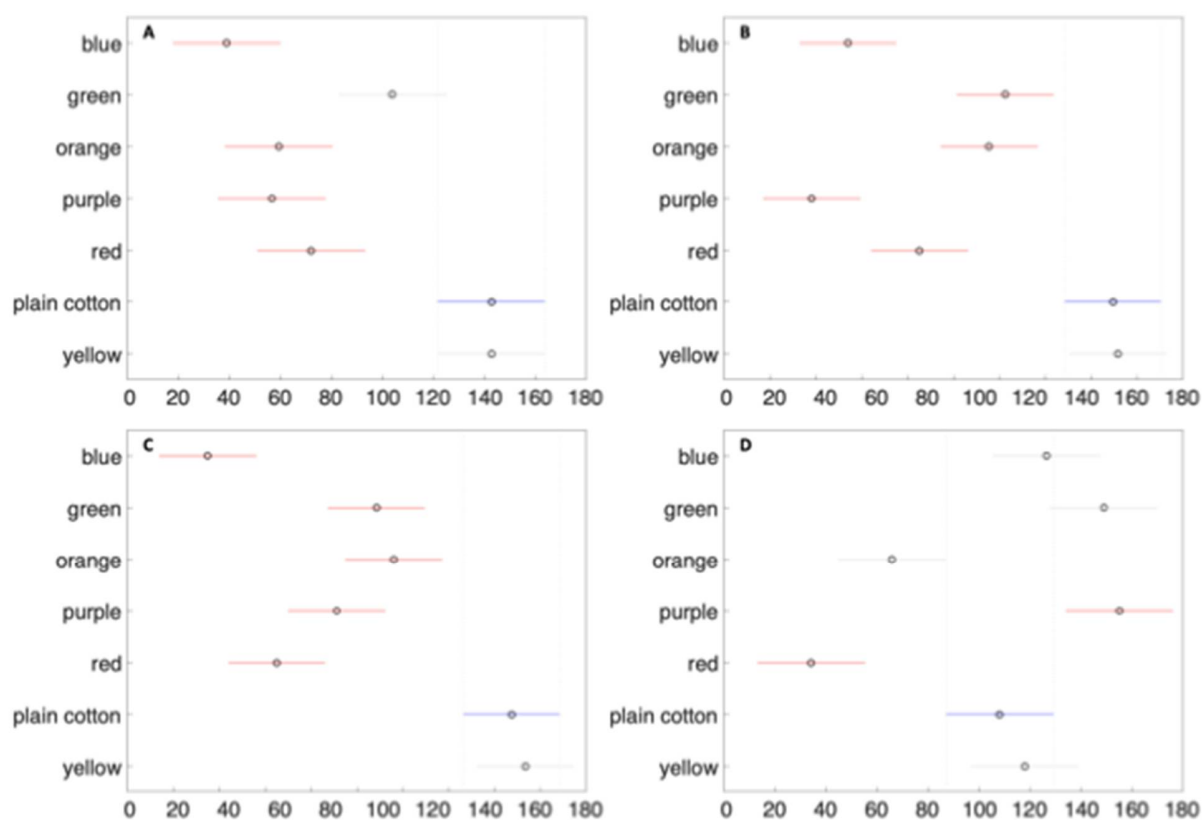

**Figure S2:** ANOVA tests of relative intensities of 1038  $\text{cm}^{-1}$  (A) 1096  $\text{cm}^{-1}$  (B) 1120  $\text{cm}^{-1}$  (C), and 1150  $\text{cm}^{-1}$  (D) bands in the Raman spectra acquired from in-lab dyed and undyed cotton fabric.

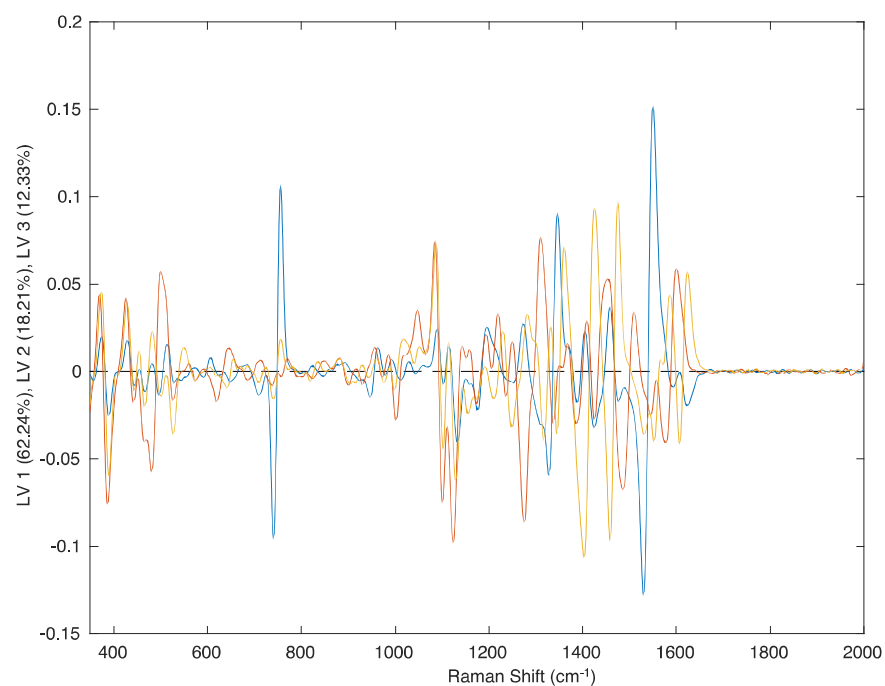

**Figure S3:** LV Plot of In-Lab Dyed Cotton Samples from PLS-DA

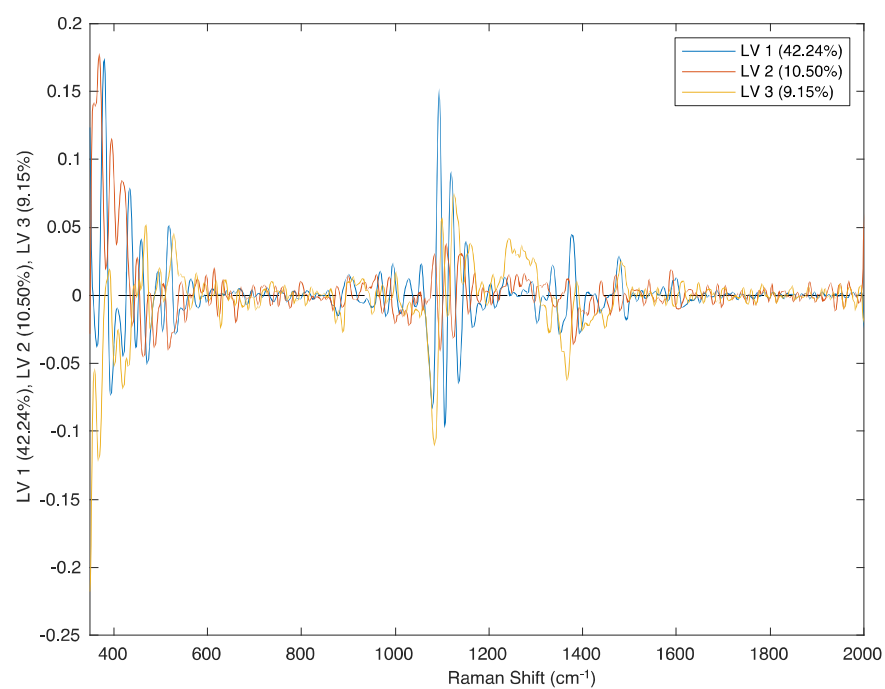

**Figure S4:** LV Plot of Plain Cotton and Yellow In-Lab Dyed Cotton from PLS-DA

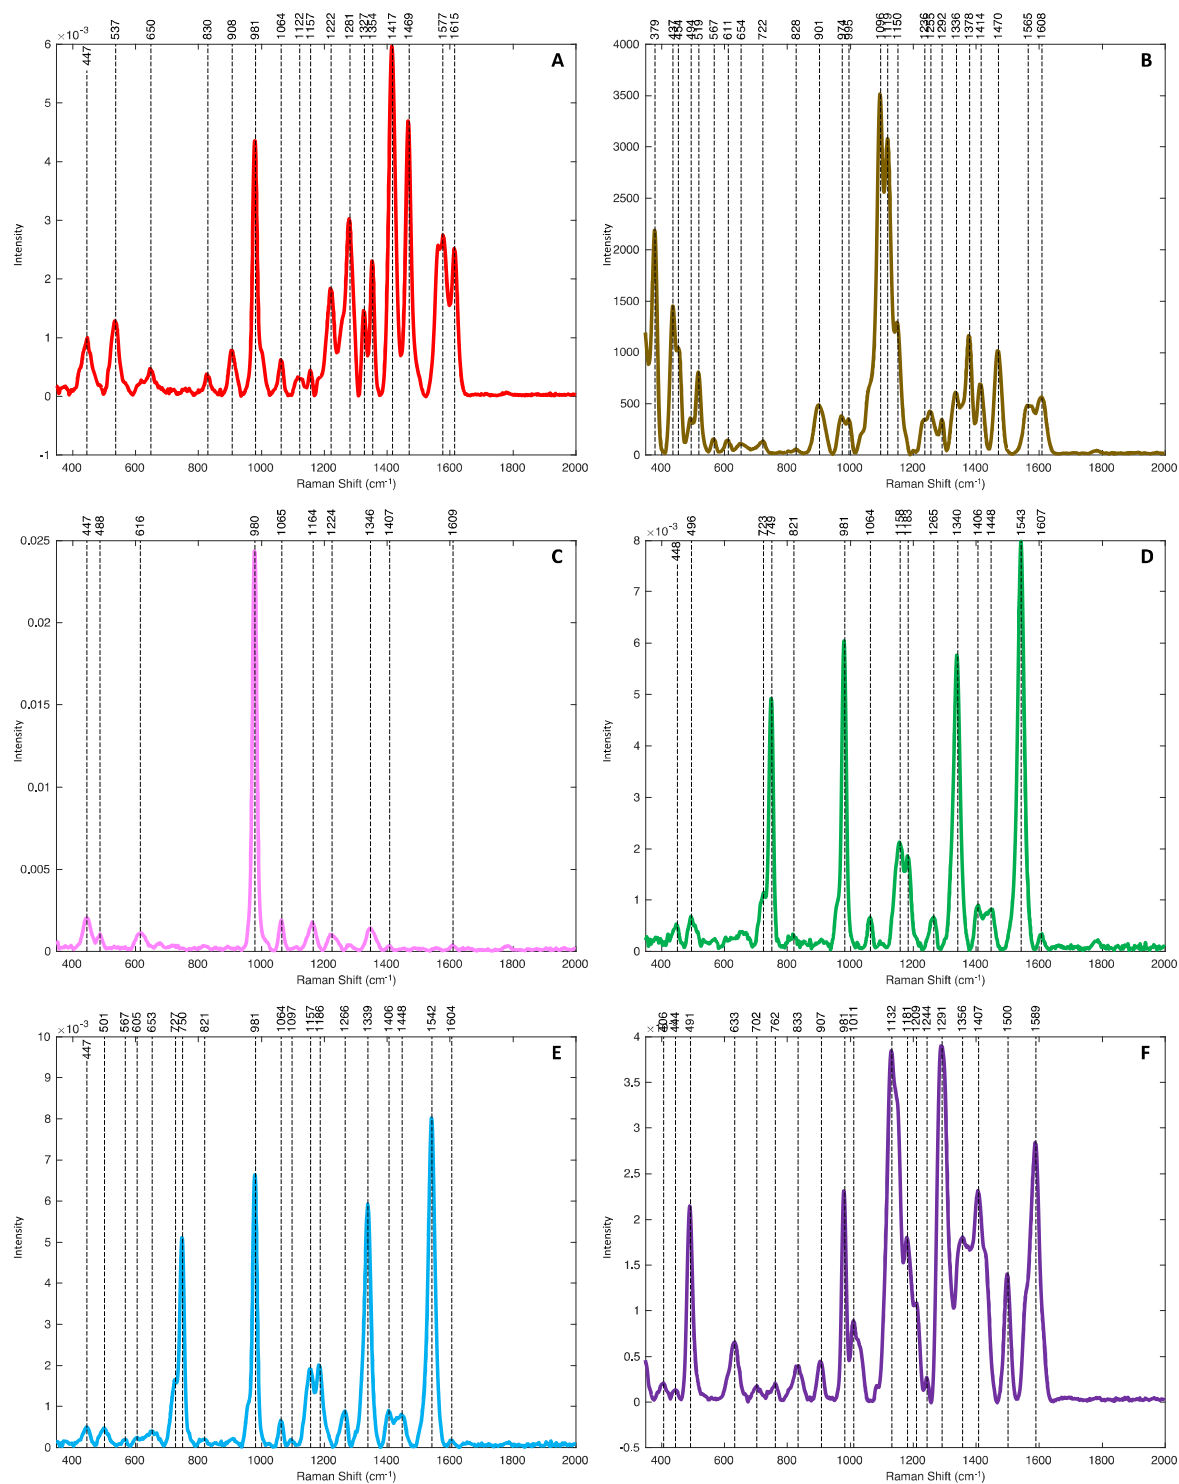

**Figure S5:** Average SORS Spectra of the following liquid dye samples: A) red B) orange C) yellow D) green E) blue and F) purple

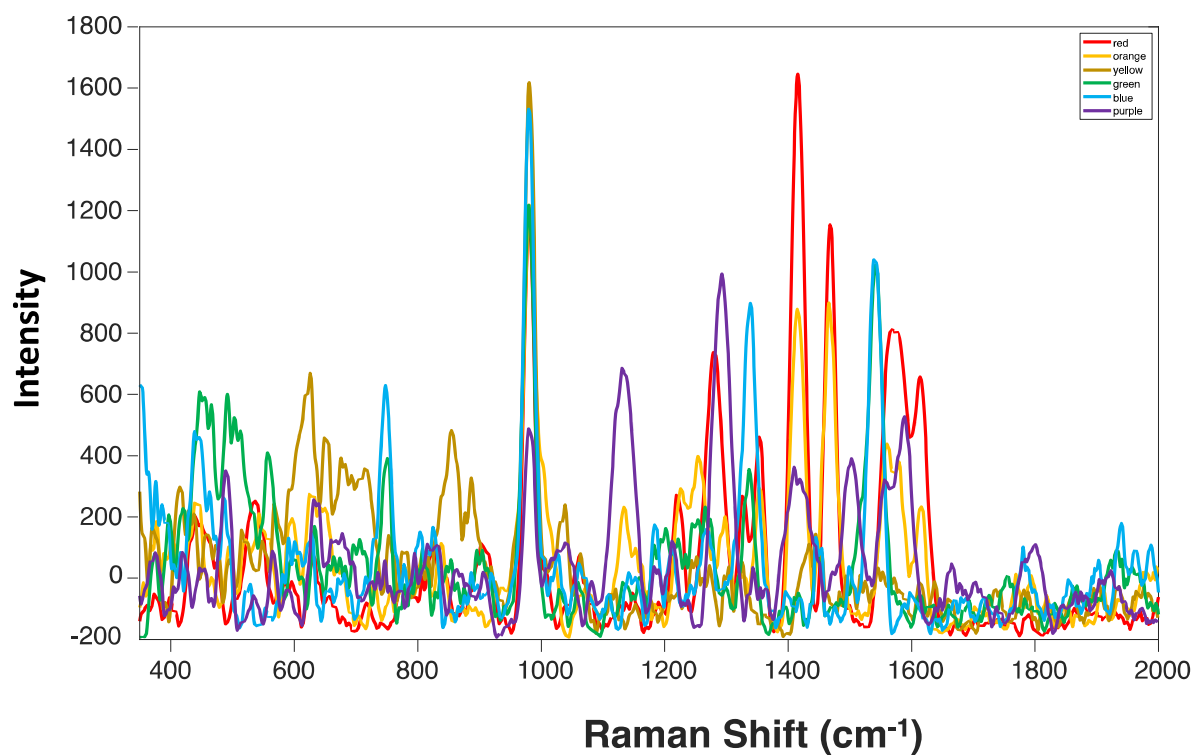

**Figure S6:** NIR Spectra acquired from dyes dissolved in water.

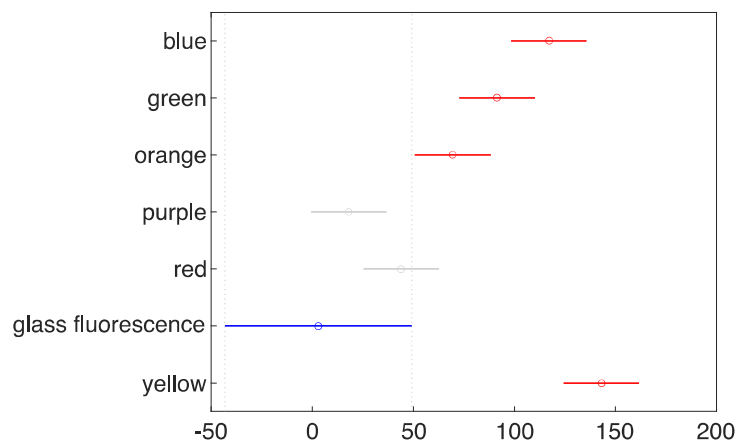

**Figure S7:** ANOVA tests of relative intensities of 980  $\text{cm}^{-1}$  in the Raman spectra acquired from dyes dissolved in water.

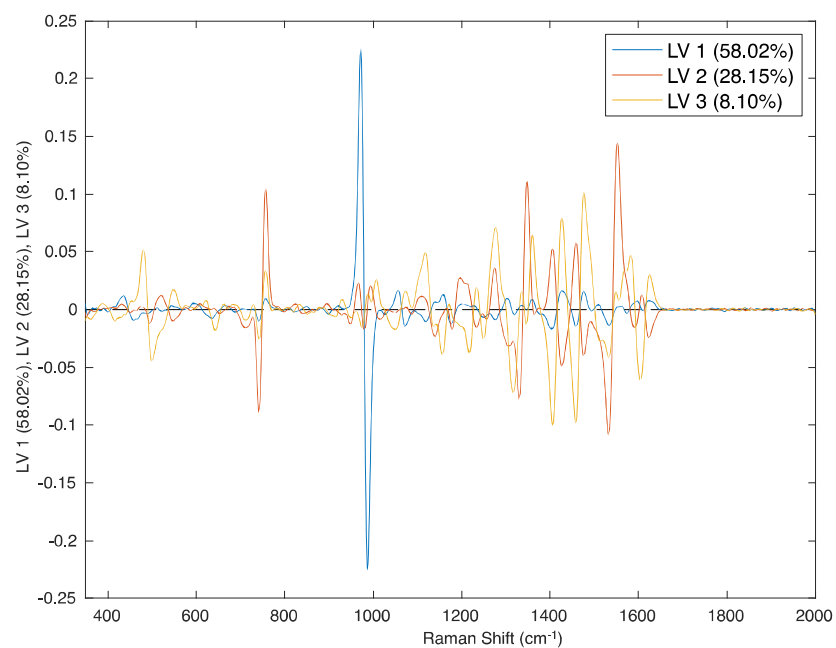

**Figure S8:** LV Plot of Liquid Dye Samples from PLS-DA

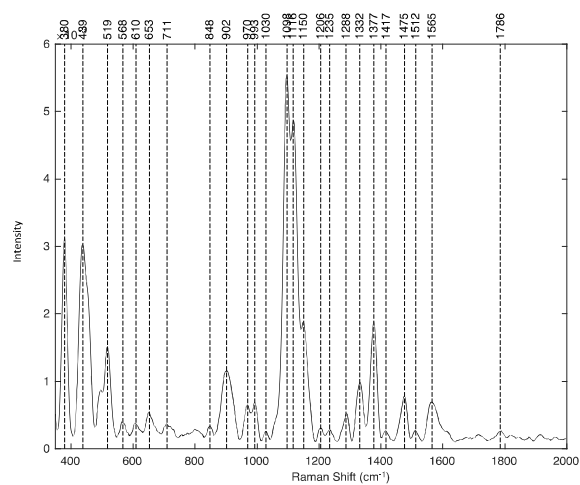

**Figure S9:** Average NIR Spectra of Brazilwood

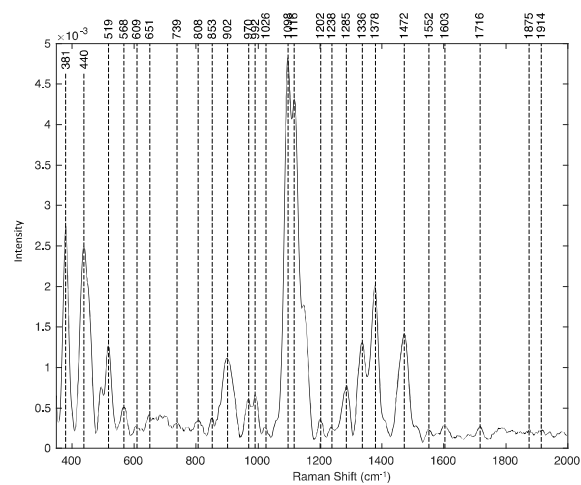

**Figure S10: Average NIR Spectra of Buckthorn**

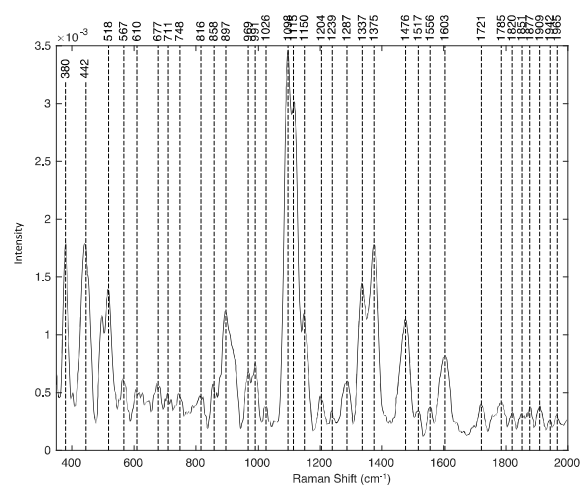

**Figure S11: Average NIR Spectra of Clutch**

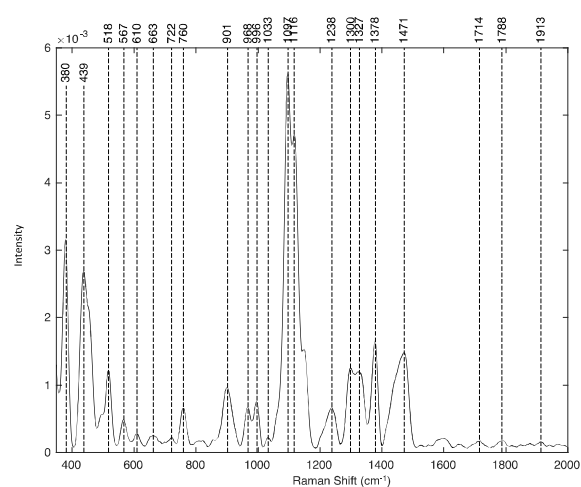

**Figure S12: Average NIR Spectra of Cochineal**

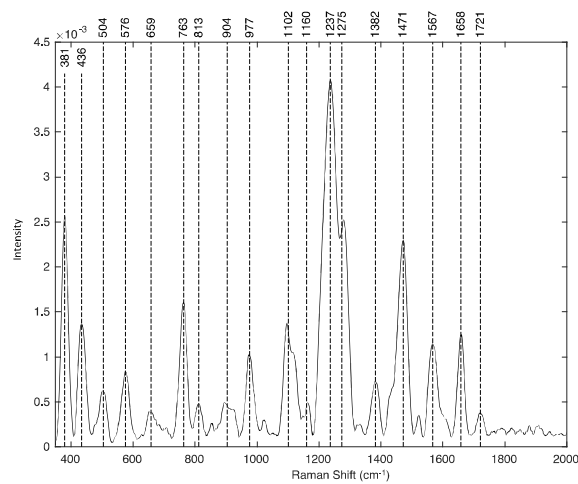

**Figure S13: Average NIR Spectra of Lac**

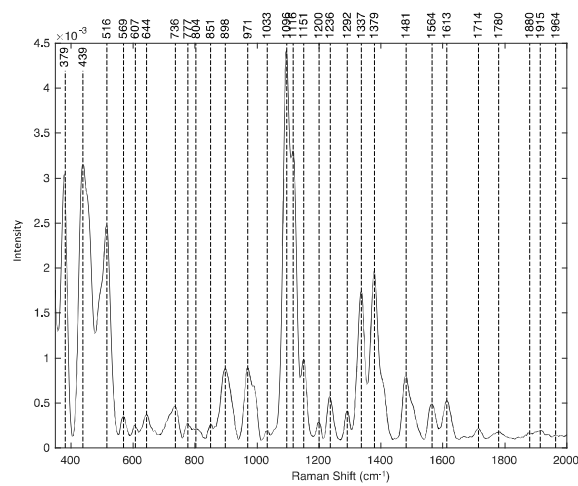

**Figure S14: Average NIR Spectra of Logwood**



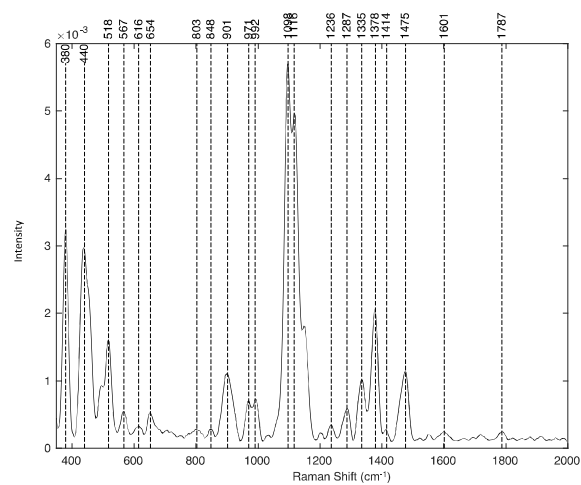

**Figure S15:** Average NIR Spectra of Madder

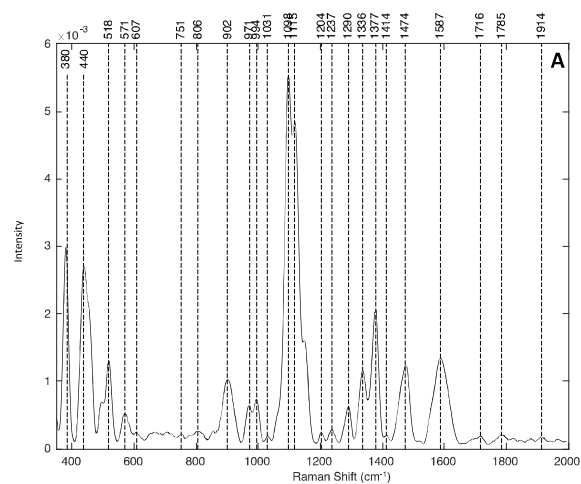

**Figure S16:** Average NIR Spectra of Pomegranate

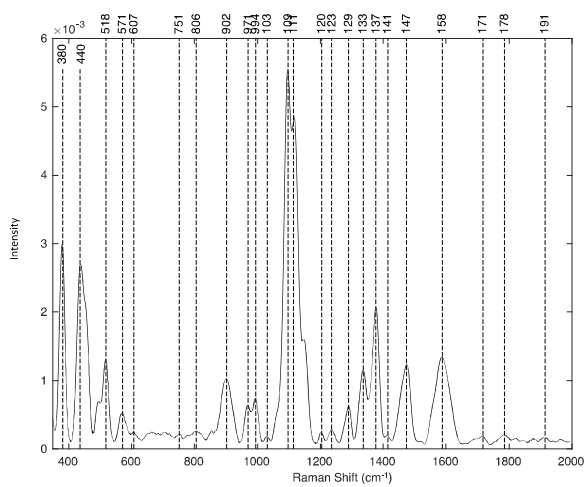

**Figure S17:** Average NIR Spectra of Weld

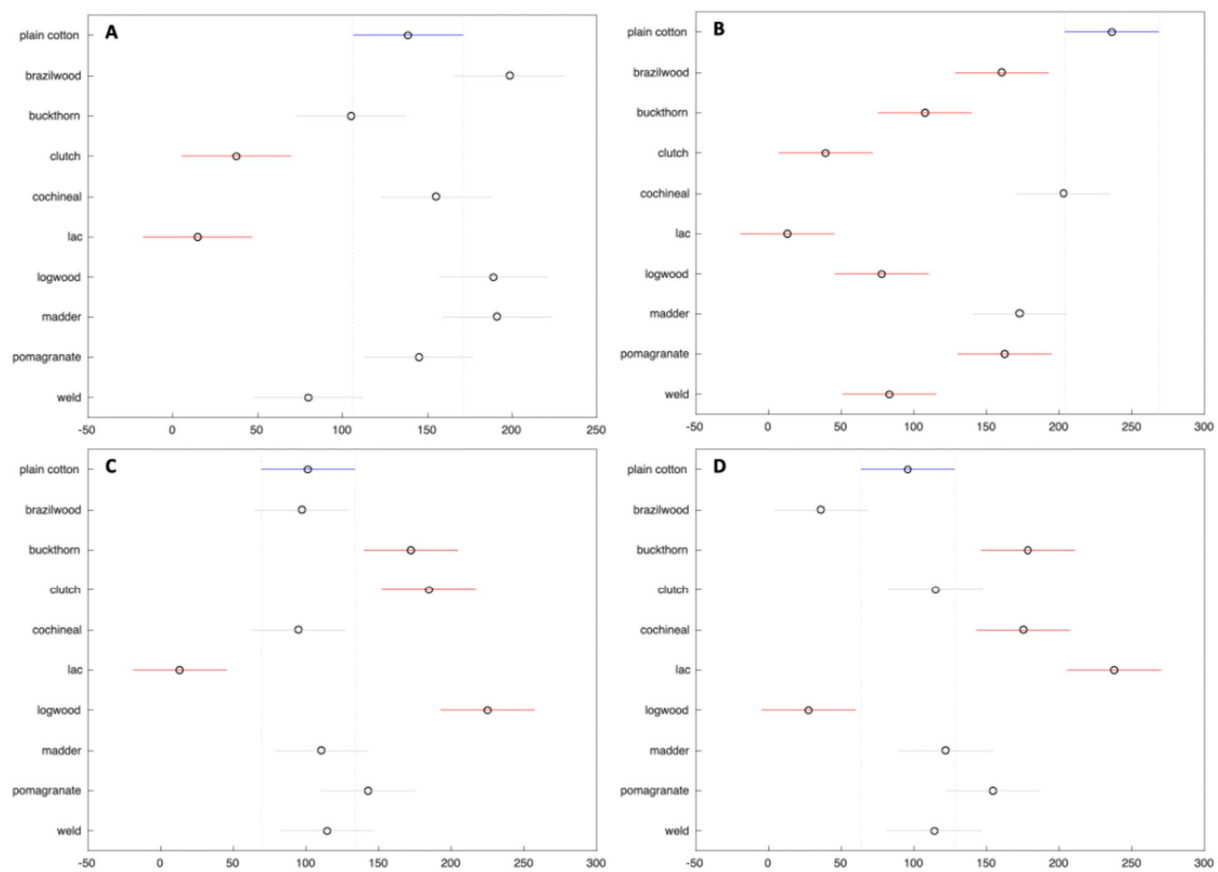

**Figure S18:** ANOVA Tests of Menil Fabric Without Nanoparticles at A) 438 cm<sup>-1</sup> B) 1097 cm<sup>-1</sup> C) 1335 cm<sup>-1</sup> and D) 1475 cm<sup>-1</sup>

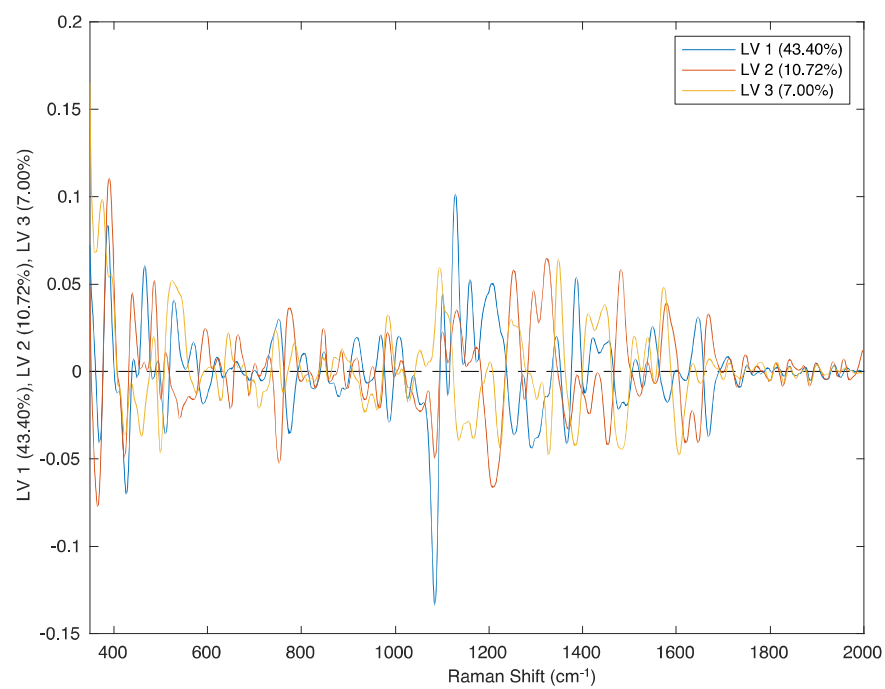

**Figure 19:** LV Plot of Menil Fabric Without Nanoparticles From PLS-DA
